# Supplementary material
Source: publisher site journal article supplement (http://www.e-cmh.org/upload/media/cmh-2020-0333-suppl2.pdf)
Supplement: Supplementary file 1 [file cmh-2020-0333-suppl2.pdf]

**Supplementary Table 2.** Clinical events during follow-up duration in the training cohort

| Clinical event                    | Number of patients* |
|-----------------------------------|---------------------|
| HCC                               | 180 (1.2)           |
| Ascites                           | 216 (1.6)           |
| Spontaneous bacterial peritonitis | 49 (0.3)            |
| Variceal bleeding                 | 44 (0.3)            |
| Hepatic encephalopathy            | 87 (0.6)            |
| Hepatorenal syndrome              | 31 (0.2)            |

Values are presented as number (%).

HCC, hepatocellular carcinoma.

\*Patients may have more than one clinical events during the follow-up duration.
